# Supplementary material for: Development of Cu(ii)-specific peptide shuttles capable of preventing Cu–amyloid beta toxicity and importing bioavailable Cu into cells
Source: Royal Society of Chemistry journal article supplement (doi:10.1039/d2sc02593k), 2022-01-01
Supplement: d2sc02593k1.pdf [file d2sc02593k1.pdf]

## Supplementary data

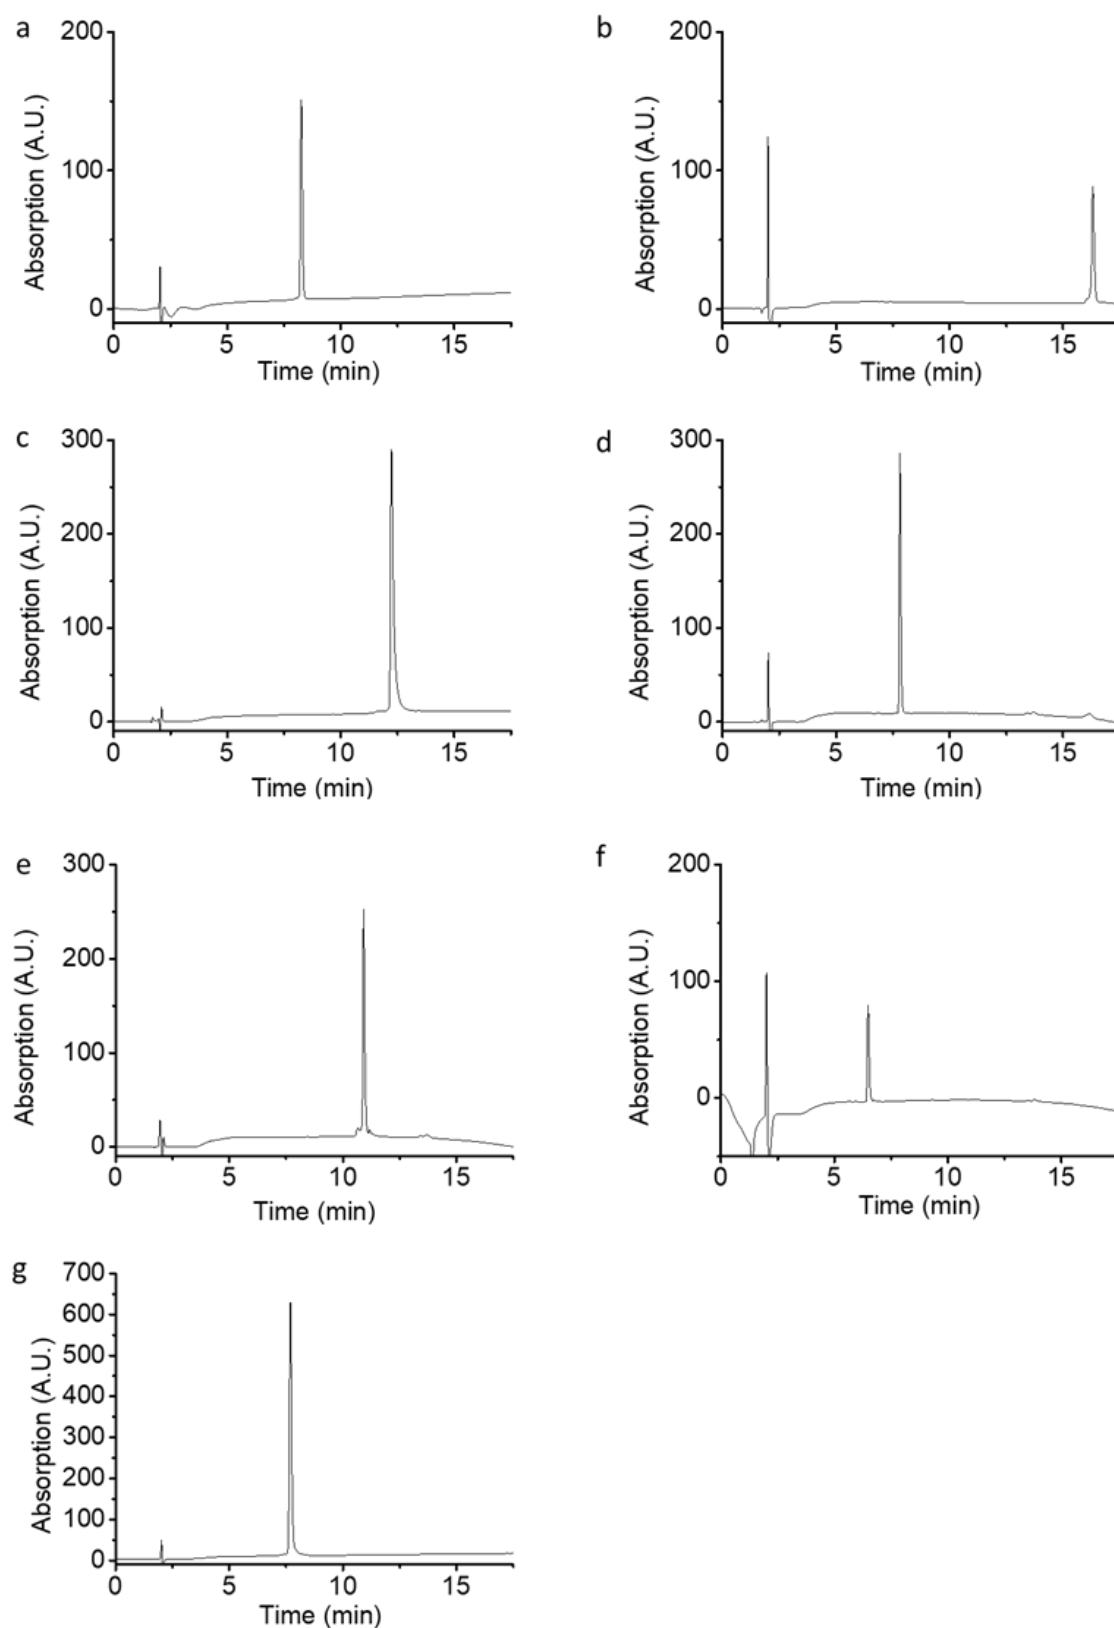

**Figure S1:** HPLC chromatogram of purified DAHK (a), SG3 (b), AKH-αR4W5<sup>NBD</sup> (c), DSIP (d), AKH-LAH4<sup>NBD</sup> (e), AKHK<sup>NBD</sup> (f), Aβ<sub>1-16</sub> (g). The separation was performed using a linear

gradient of buffer A (TFA 0.1%) and buffer B (TFA 0.1%, ACN 90%) ranging from 5% buffer B to 100% buffer B in 30 minutes, flow 1ml/min, and UV detection at 214 nm.

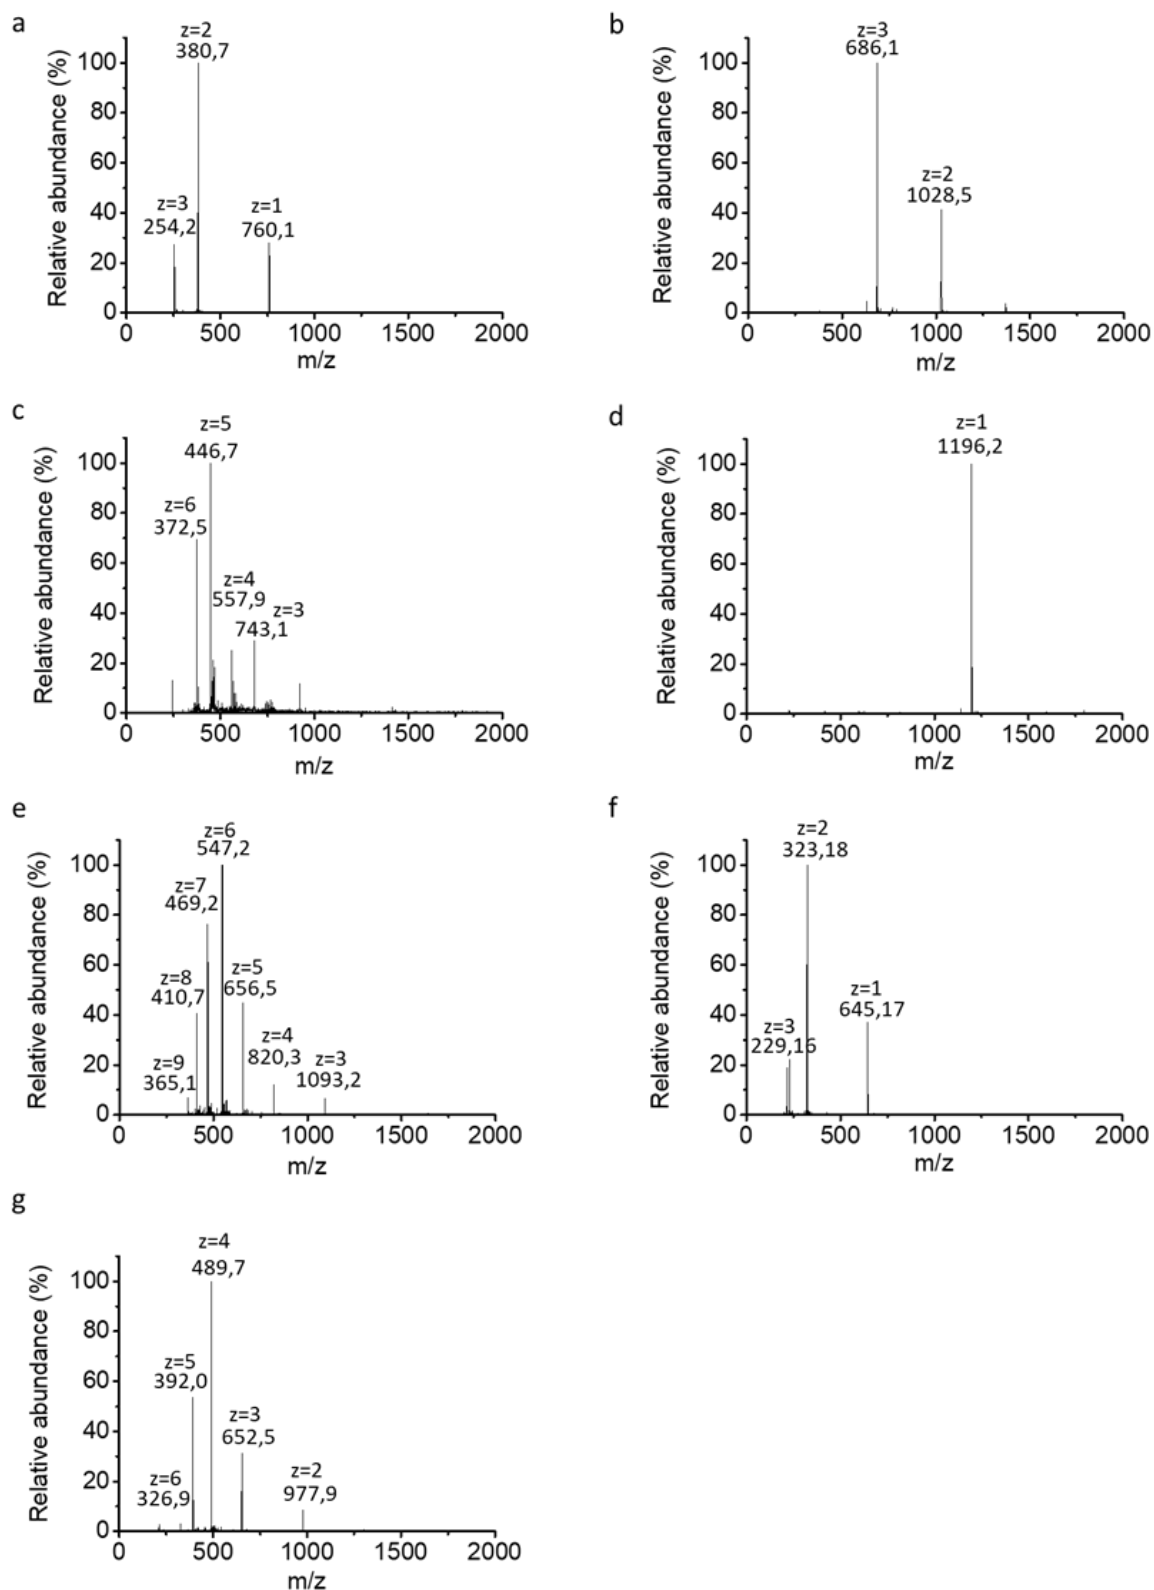

**Figure S2:** LC-MS spectra of purified DAHK (a), SG3 (b), AKH-αR4W5<sup>NBD</sup> (c), DSIP (d), AKH-LAH4<sup>NBD</sup> (e), AKHK<sup>NBD</sup> (f), Aβ<sub>1-16</sub> (g). The separation was performed using a linear gradient of buffer A (Formic acid 0.1%) and buffer B (Formic acid 0.1%, ACN 90%) ranging

from 5% buffer B to 100% buffer B in 15 minutes, flow 1ml/min, and m/z detection from 0 to 2000 Da.

|                                   | Theoretical m/z | Observed m/z | Yield (%) | Purity (%) |
|-----------------------------------|-----------------|--------------|-----------|------------|
| DAHKK <sup>NBD</sup>              | 759.78          | 760.10       | 5.72      | 99.8       |
| SG3 <sup>NBD</sup>                | 2055.35         | 2054.80      | 1         | 87.4       |
| AKH- $\alpha$ R5W4 <sup>NBD</sup> | 2227.55         | 2228.14      | 2         | 98.95      |
| DSIP <sup>NBD</sup>               | 1194.18         | 1196.08      | 8         | >99        |
| AKH-LAH4 <sup>NBD</sup>           | 3276.04         | 3277.22      | 4.3       | 88.3       |
| AKHK <sup>NBD</sup>               | 644.31          | 644.57       | 13.3      | 94.3       |
| A $\beta$ <sub>1-16</sub>         | 1954.05         | 1954.57      | 65.7      | 98.2       |

**Table S1:** Comparison between theoretical and observed m/z values of purified peptides as well as their yield and purity

| Peptide       | ATCUN Motif | Linker + CPP Sequence       | Fluorophore (AA Position) | C-ter |
|---------------|-------------|-----------------------------|---------------------------|-------|
| SG3           | -           | -KGRLSGMNEVLSFRWL           | NBD (1)                   | Amide |
| $\alpha$ R5W4 | -           | -KGRRWRRWRR                 | NBD (1)                   | Amide |
| AKH-LAH4      | AKH-        | -KKALLALALHHLAHLALHLALALKKA | NBD (2)                   | Amide |
| DSIP          | -           | -KGWAGGDASGE                | NBD (1)                   | Amide |

**Table S2:** List of peptides screened for their capacity to penetrate PC12 cells: Peptides synthesized contained different CPPs previously tested in the literature, including SG3<sup>50</sup>, and  $\alpha$ R5W4<sup>39</sup> or has been shown to be an effective antimicrobial peptide LAH4 (LAH5 and AKH-LAH4)<sup>51</sup>.

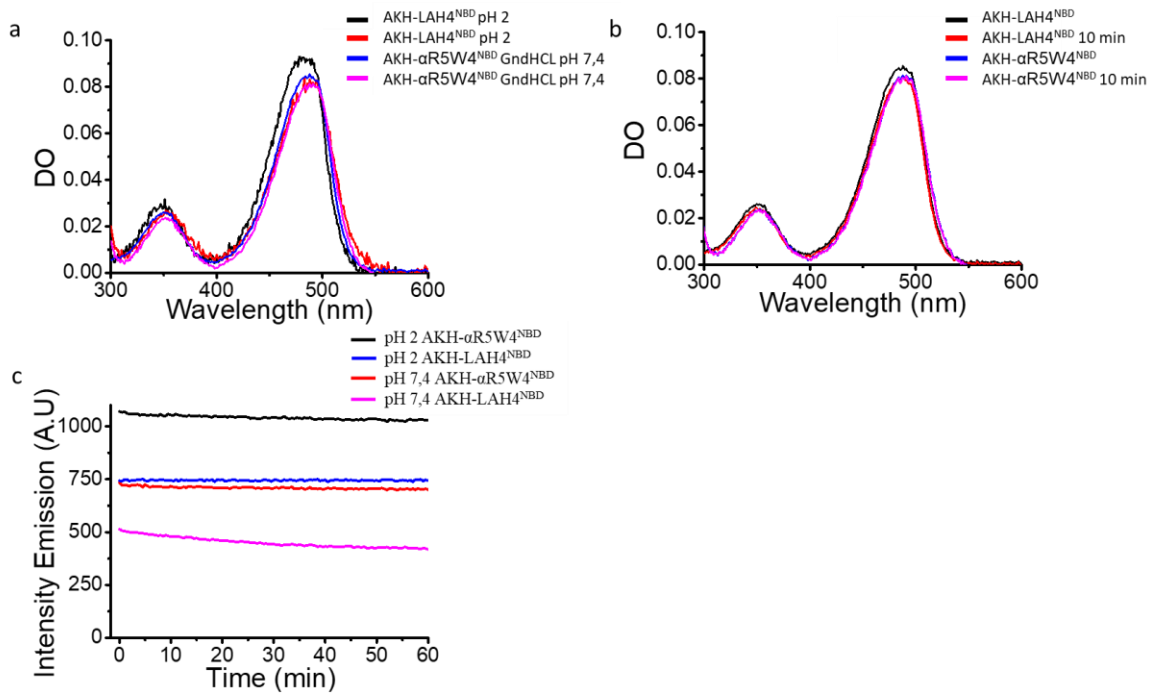

**Figure S3:** (a) Absorption spectra of AKH-αR5W4<sup>NBD</sup> versus AKH-LAH4<sup>NBD</sup> at pH 2 or at pH 7.4 GndHCL 6M. (b) Absorption spectra of AKH-αR5W4<sup>NBD</sup> versus AKH-LAH4<sup>NBD</sup> at pH 7.4 GndHCL 6M at 0 min vs 10 min incubation. (c) Stability of AKH-αR5W4<sup>NBD</sup> versus AKH-LAH4<sup>NBD</sup> at different pH: Each peptide was incubated in solutions at either pH 2 (0.01% TFA) or pH 7.4 (100 mM HEPES) for 60 min. Conditions: AKH-αR5W4<sup>NBD</sup> = AKH-LAH4<sup>NBD</sup> = 4 μM; pH 2 was buffered using 0.01% TFA; pH 7.4 was buffered using 100 mM HEPES in the presence (a and b) or absence (c) of GndHCL 6M. Experiments are representative of 3 independent experiments.

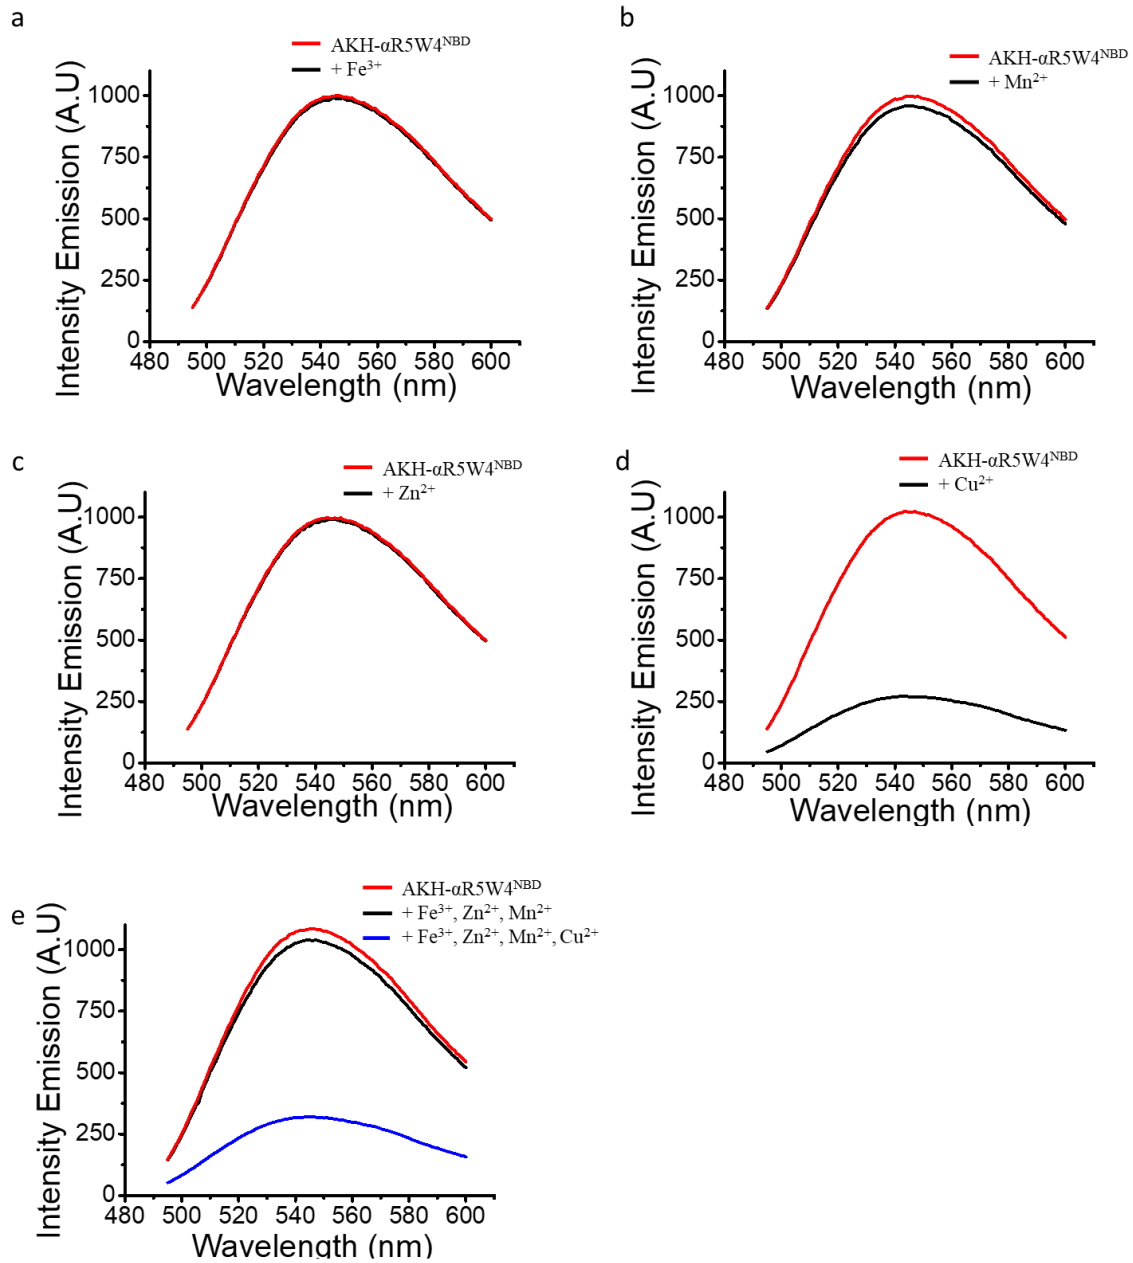

**Figure S4:** Spectra depicting the quenching of AKH- $\alpha$ R5W4<sup>NBD</sup> by different metal ions as plotted in Figure 3a. Conditions: AKH- $\alpha$ R5W4<sup>NBD</sup>: 7  $\mu$ M ; Cu(II), Zn(II), Fe(III), Mn(II):5  $\mu$ M; HEPES 100 mM pH 7.4.

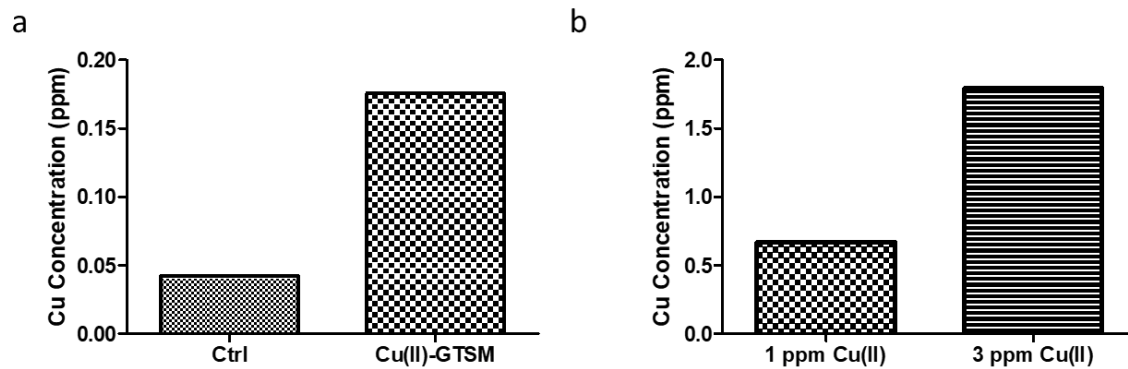

**Figure S5:** a) Cu concentration in untreated cells (Ctrl) and after 1h 1  $\mu$ M GTSM treatment measured by ICP-AES per  $2 \times 10^6$  PC12 cells. b) Detected Cu concentration in medium containing cell lysate after spiking Cu(II) with 1ppm (15.74  $\mu$ M) and 3ppm (47.2  $\mu$ M) Cu(II). Values are expressed as in parts per million (ppm)

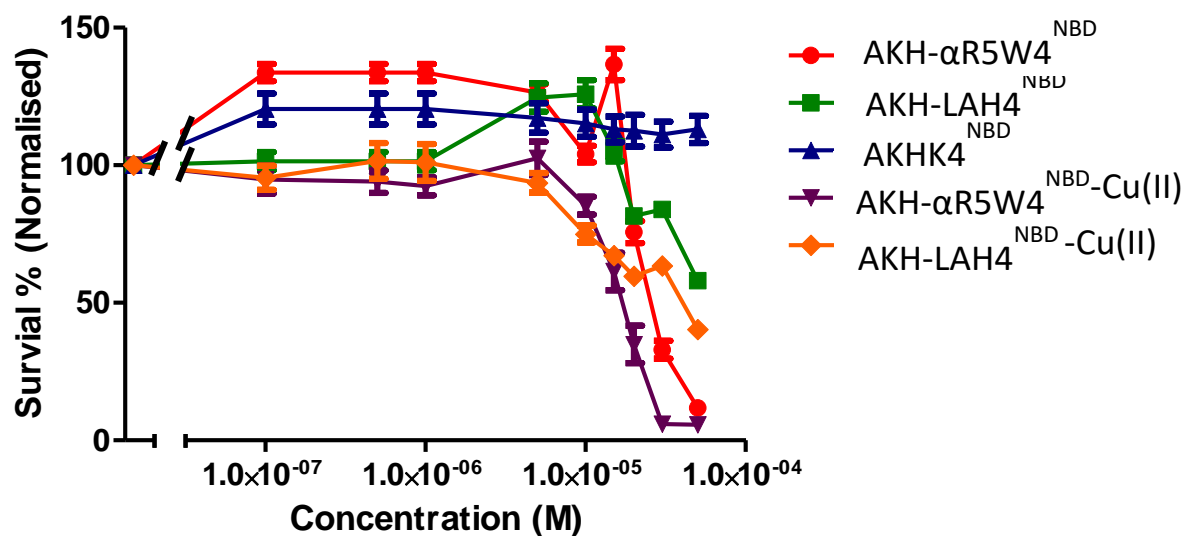

**Figure S6:** Viability of PC12 after treatment with AKH- $\alpha$ R5W4<sup>NBD</sup> or AKH-LAH4<sup>NBD</sup> in presence and absence of Cu(II).  $5 \times 10^4$  PC12 cells were incubated with the indicated concentration of peptides.

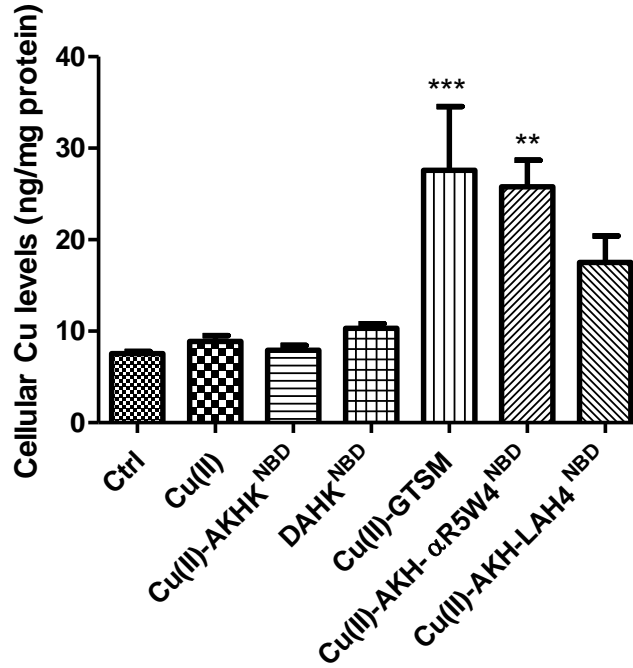

**Figure S7:** *AKH-αR5W4<sup>NBD</sup>* and *AKH-LAH4<sup>NBD</sup>* imports Cu into PC12 cells after 1h incubation at 37°C, measured by ICP-MS. Each condition was done in duplicates,  $n=3$  independent experiments with  $2.10^6$  PC12 cells. A parametric ANOVA test was carried out with a Dunnett's Multiple Comparison Test \*\*  $p<0,001$ , \*\*\*  $p<0,0001$ .

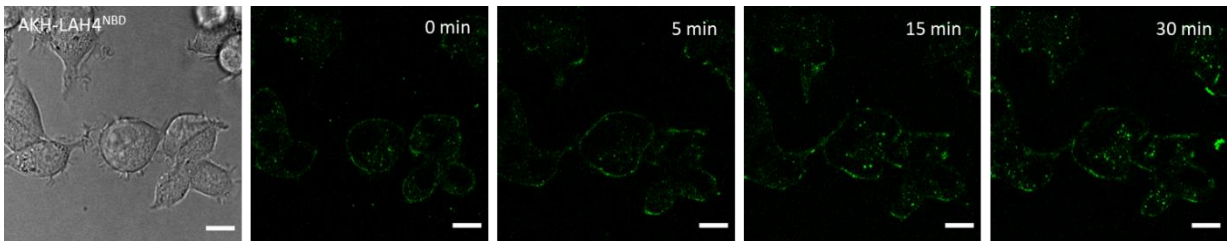

**Figure S8:** Penetration of *Cu(II)-AKH-LAH4<sup>NBD</sup>* into PC12 cells. Representative images at the indicated time obtained from live imaging performed on  $5.10^4$  cells incubated with *Cu(II)-AKH-LAH4<sup>NBD</sup>* =  $1 \mu\text{M}$ , at 37°C using a Leica TCS SP5 (II) confocal microscope, with an excitation wavelength at 477 nm for 30min. Time point zero is about 1 minute after incubation with the peptides. Bars =  $10 \mu\text{m}$ . Similar observations were obtained with 5 different cell cultures.

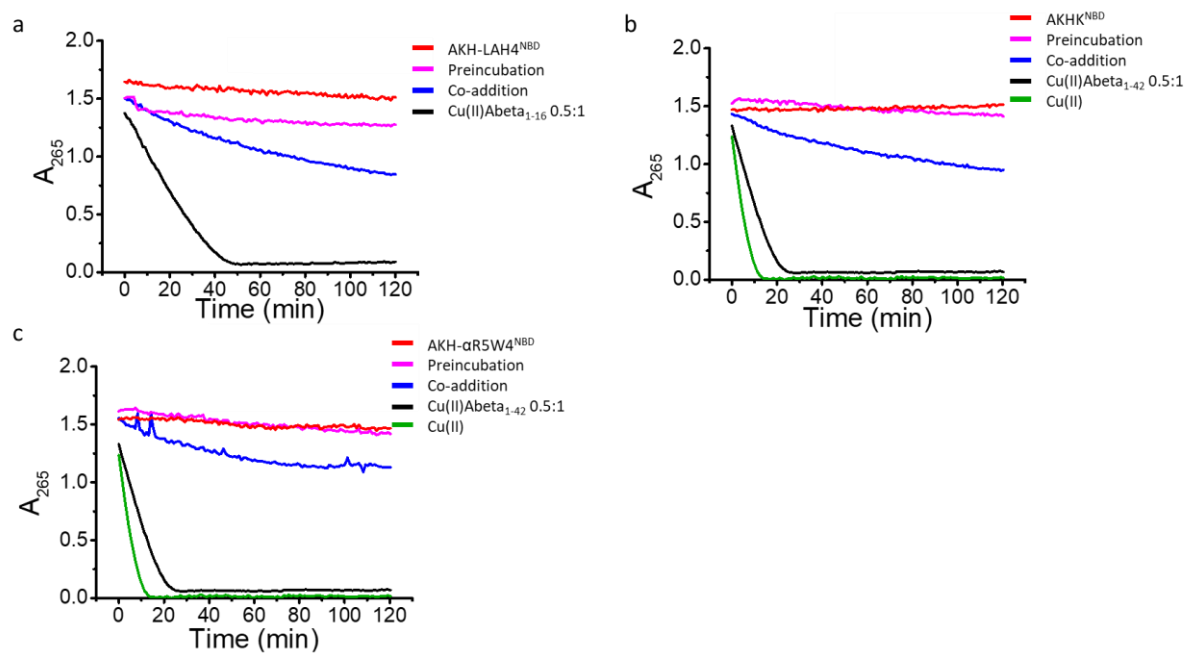

**d**

| Conditions                          |                | Asc consumption ( $\mu\text{M}/\text{min}$ ) | SD (+/-) |
|-------------------------------------|----------------|----------------------------------------------|----------|
| Abeta <sub>1-16</sub> -Cu(II) 0.5:1 |                | 1.51                                         | 0.13     |
| AKH- $\alpha$ R5W4 <sup>NBD</sup>   | DFO            | 0.13                                         | 0.06     |
|                                     | Pre-Incubation | 0.33                                         | 0.03     |
|                                     | Co-addition    | 1.20                                         | 0.05     |
| AKH-LAH4 <sup>NBD</sup>             | DFO            | 0.06                                         | 0.06     |
|                                     | Pre-Incubation | 0.11                                         | 0.02     |
|                                     | Co-addition    | 0.44                                         | 0.21     |
| AKHK <sup>NBD</sup>                 | DFO            | 0.02                                         | 0.02     |
|                                     | Pre-Incubation | 0.06                                         | 0.03     |
|                                     | Co-addition    | 1.30                                         | 0.56     |
| Abeta <sub>1-42</sub> -Cu(II) 0.5:1 |                | 5.50                                         | 1.07     |
| AKH- $\alpha$ R5W4 <sup>NBD</sup>   | Pre-Incubation | 0.07                                         | 0.10     |
|                                     | Co-addition    | 0.65                                         | 0.28     |
| AKHK- $\alpha$ R5W4 <sup>NBD</sup>  | Pre-Incubation | 0.03                                         | 0.15     |
|                                     | Co-addition    | 0.82                                         | 0.28     |

**Figure S9:** Retrieval of Cu(II) from A $\beta$  by AKH- $\alpha$ R5W4<sup>NBD</sup>, AKHK<sup>NBD</sup> or AKH-LAH4<sup>NBD</sup>, reduces ROS production. (a) Inhibition of Cu(II)-A $\beta$ <sub>1-16</sub> ROS production by AKH-LAH4<sup>NBD</sup>. Inhibition of Cu(II)-A $\beta$ <sub>1-42</sub> ROS production by AKH- $\alpha$ R5W4<sup>NBD</sup> (b), or AKHK<sup>NBD</sup> (c) monitored by the absorbance at 265 nm of ascorbate. Preincubation: 10  $\mu$ M Cu(II)-A $\beta$ <sub>1-16/42</sub> 0.5:1 and 5  $\mu$ M AKH- $\alpha$ R5W4<sup>NBD</sup>, AKHK<sup>NBD</sup> or AKH-LAH4<sup>NBD</sup> were incubated for 1h before addition of ascorbate followed by absorbance measurement; Co-addition: 10  $\mu$ M Cu(II)-A $\beta$ <sub>1-16</sub> 0.5:1 and 5  $\mu$ M AKH- $\alpha$ R5W4<sup>NBD</sup> or AKHK<sup>NBD</sup> is added together with ascorbate followed by absorbance measurement. (d) Table showing the consumption of ascorbate expressed in  $\mu$ M/min. Conditions: Asc: 100  $\mu$ M, AKH- $\alpha$ R5W4<sup>NBD</sup>=AKHK<sup>NBD</sup>=AKH-LAH4<sup>NBD</sup> = Cu:5  $\mu$ M, A $\beta$ <sub>1-16</sub> : 10  $\mu$ M, DFO: 10  $\mu$ M; HEPES 100 mM pH 7,4. n=2 independent experiments.

|                                   | (a)A $\beta$ <sub>1-16</sub> |                            | (b)GSH             |                              |
|-----------------------------------|------------------------------|----------------------------|--------------------|------------------------------|
|                                   | Half time<br>(min)           | Fluorescence<br>Quench (%) | Half time<br>(min) | Fluorescence<br>Recovery (%) |
| AKH- $\alpha$ R5W4 <sup>NBD</sup> | 10.52 $\pm$ 0.6              | 91.3 $\pm$ 10.1            | 30.9 $\pm$ 5.9     | 79 $\pm$ 4.3                 |
| AKHK <sup>NBD</sup>               | 12.39 $\pm$ 1.2              | 105.2 $\pm$ 5              | 96.4 $\pm$ 7.4     | 86.1 $\pm$ 12                |

**Figure S10:** (a) Kinetics of Cu(II) transfer from A $\beta$ <sub>1-16</sub> to AKH- $\alpha$ R5W4<sup>NBD</sup> or AKHK<sup>NBD</sup>. Conditions: AKH- $\alpha$ R5W4<sup>NBD</sup> and AKHK<sup>NBD</sup>: 5  $\mu$ M; A $\beta$ <sub>1-16</sub> :10  $\mu$ M; Cu:5  $\mu$ M; DMEM 10% pH 7,4; 25°C; n=3. (b) Reduction kinetics of Cu(II) on AKH- $\alpha$ R5W4<sup>NBD</sup> or AKHK<sup>NBD</sup> by 5 mM GSH. Conditions: 4  $\mu$ M Cu(II)-AKH-CPP<sup>NBD</sup>, 5 mM GSH, HEPES 100 mM pH 7.4; 37°C; n=3 independent experiments.

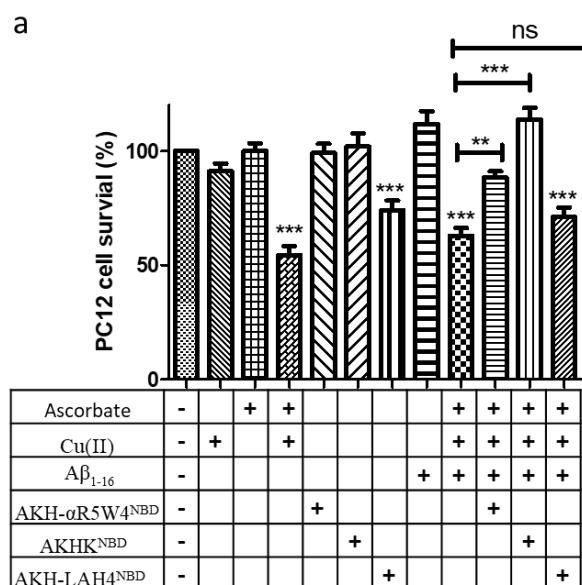

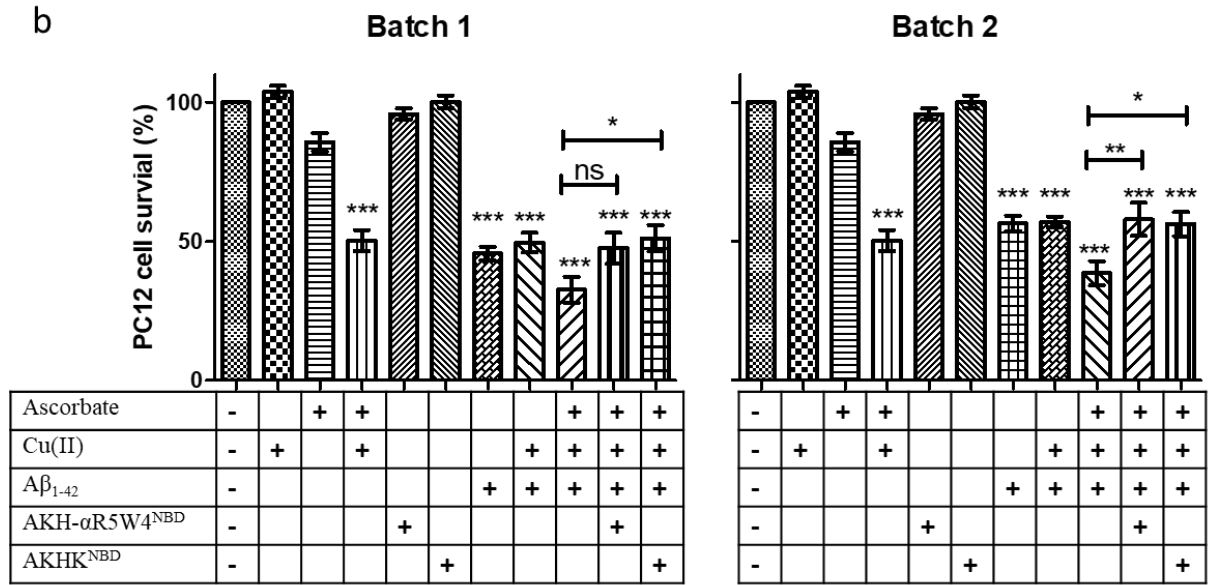

**Figure S11:** Transfer of Cu(II) from Aβ to ATCUN motif prevents Cu-induced ROS production and toxicity to PC12 cells. (a) Aβ<sub>1-16</sub>, (b) Aβ<sub>1-42</sub> (2 different batches). Preincubation of 5 μM AKH-LAH4<sup>NBD</sup>, AKH-αR5W4<sup>NBD</sup> or AKHK<sup>NBD</sup> with 10 μM Cu(II)-Aβ<sub>1-16/42</sub> 0.5:1 in 10% DMEM in a test tube for 1h before addition of 500μM ascorbate and immediate administration on the PC12 cells. Experiments were done in triplicates, n=3. A parametric ANOVA test was carried out with a Tukey Post Test \*\*  $p < 0,001$ , \*\*\*  $p < 0,0001$ . Experiments were carried out in DMEM dilutes to 10% (10% DMEM) with salts: 0.2g/L CaCl<sub>2</sub>, 0.0001g/L Fe(NO<sub>3</sub>)<sub>3</sub>, 0.098g/L MgSO<sub>4</sub>, 0.4g/L KCl, 3.7g/L NaHCO<sub>3</sub>, 6.4g/L NaCl, 0.11g/L NaH<sub>2</sub>PO<sub>4</sub>, 4.5g/L D-Glucose.
